# Supplementary material for: CTen: a web-based platform for identifying enriched cell types from heterogeneous microarray data
Source: PubMed Central journal article supplement (PMC3473317; doi:10.1186/1471-2164-13-460), 2012-09-06

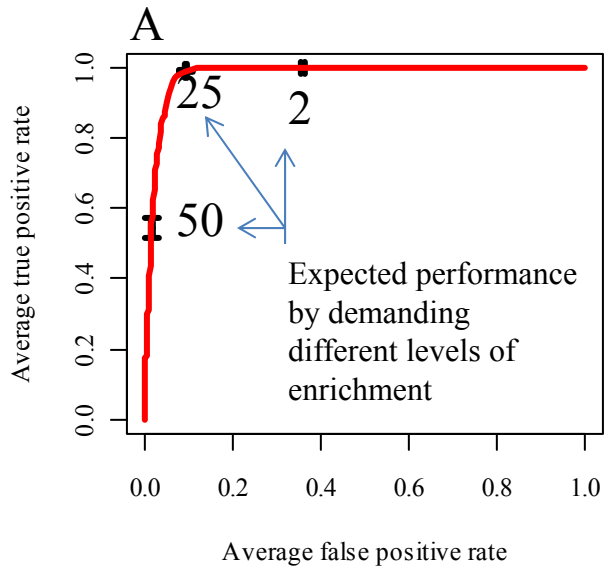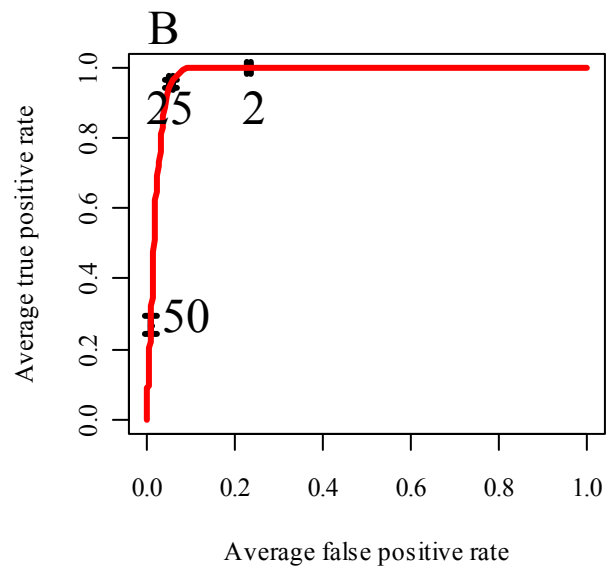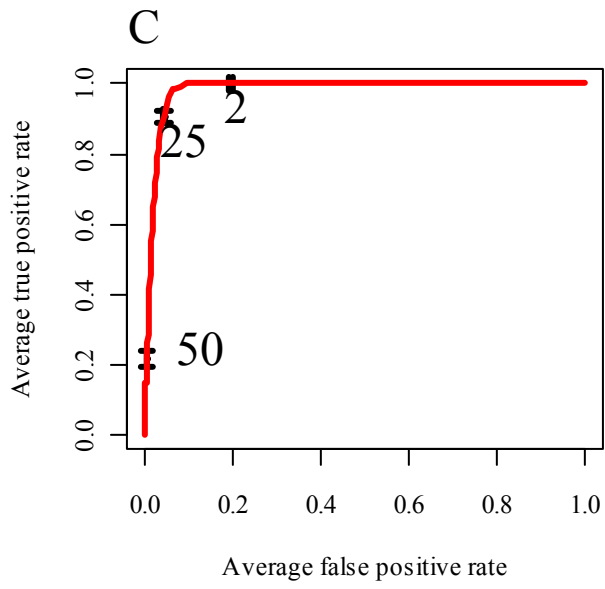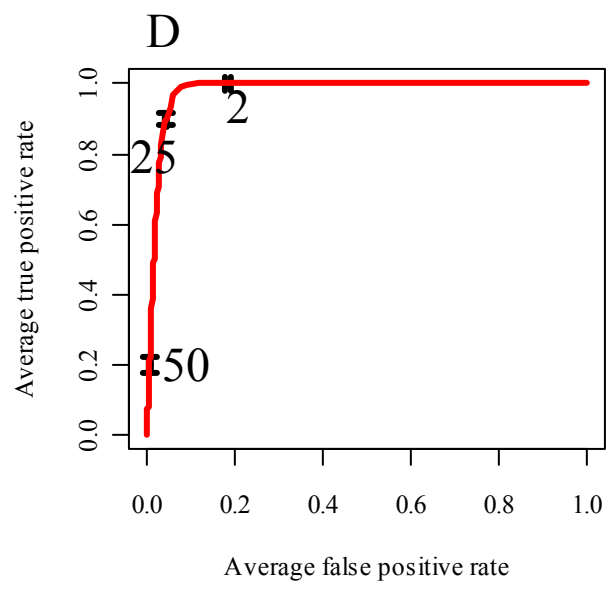

Supplement: 1471-2164-13-460-S2.pdf [file 1471-2164-13-460-S2.pdf]
