# Supplementary material for: CTen: a web-based platform for identifying enriched cell types from heterogeneous microarray data
Source: PubMed Central journal article supplement (PMC3473317; doi:10.1186/1471-2164-13-460), 2012-09-06

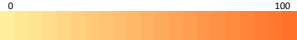

The % of common HEC5 genes shared between any two cell types for mouse (upper triangle) and human (lower triangle) cell types

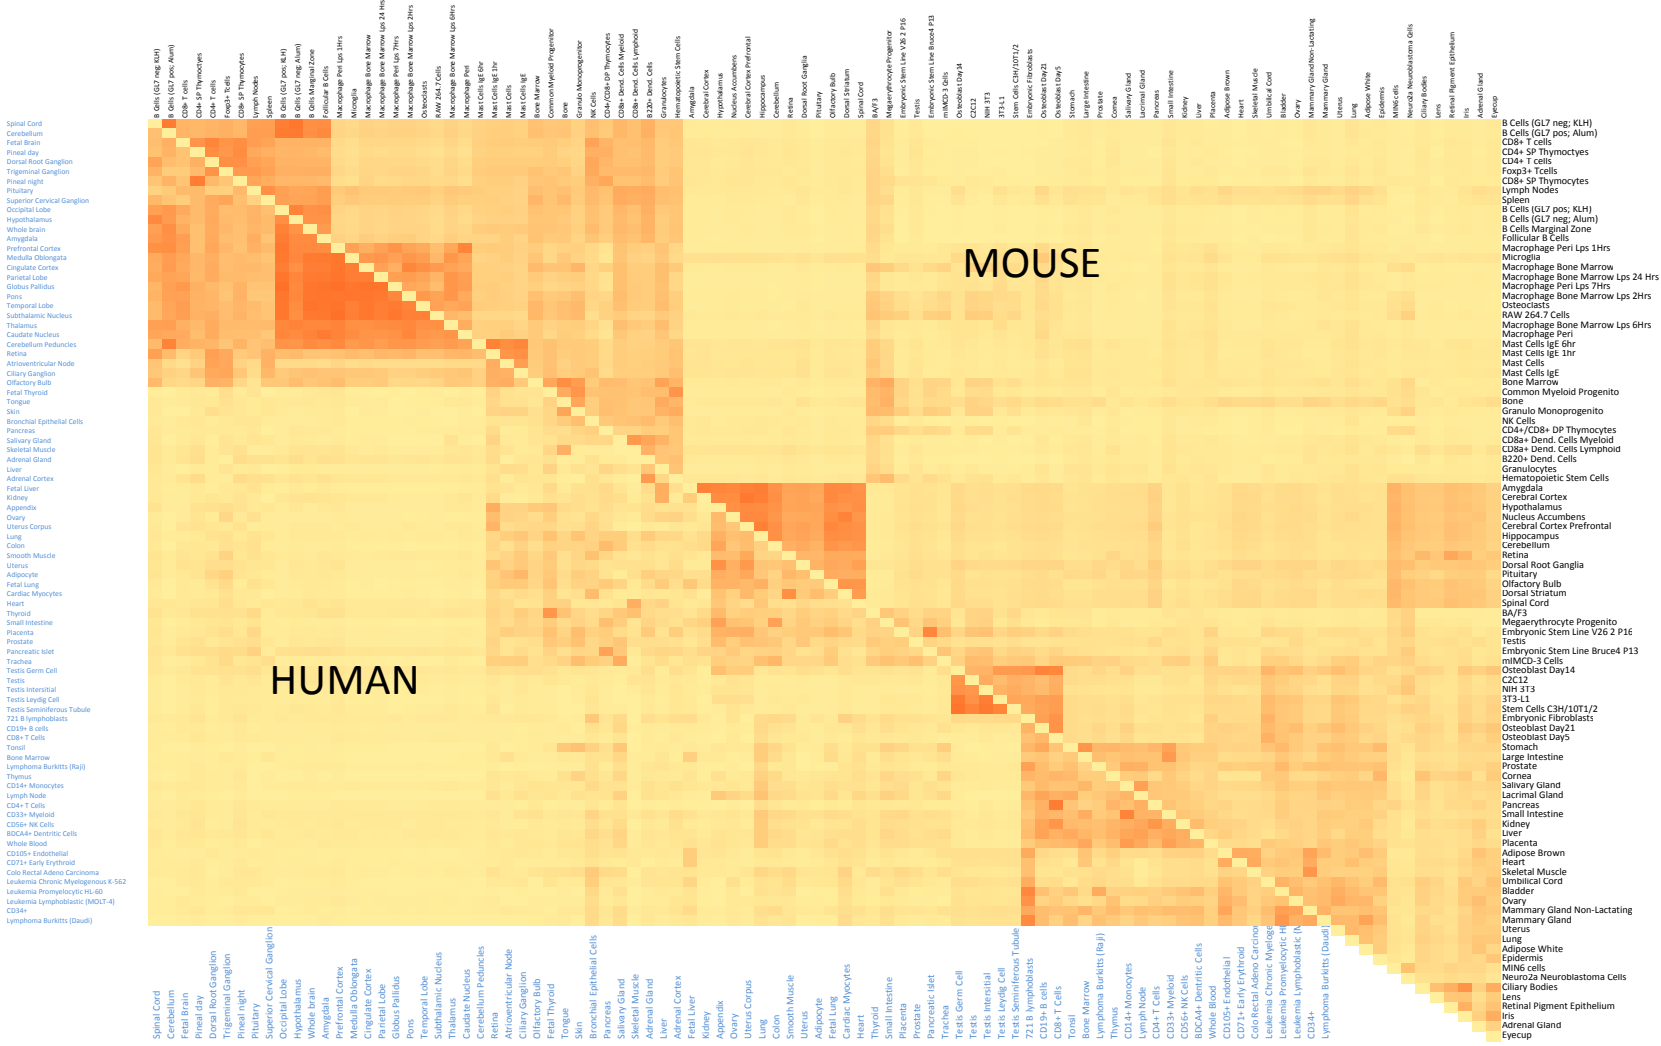

Supplement: 1471-2164-13-460-S4.pdf [file 1471-2164-13-460-S4.pdf]
